# Supplementary material for: Identification of Zirconia Particle Uptake in Human Osteoblasts by ToF-SIMS Analysis and Particle-Size Effects on Cell Metabolism
Source: MDPI journal article supplement (doi:10.3390/nano12234272), 2022-12-01
Supplement: s1 [file s1]

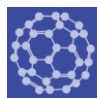

## Supplementary Materials

# Identification of Zirconia Particle Uptake in Human Osteoblasts by ToF-SIMS Analysis and Particle-Size Effects on Cell Metabolism

Alexander Welle <sup>1,2,†</sup>, Kerstin Rabel <sup>3,†</sup>, Matthias Schwotzer <sup>2</sup>, Ralf Joachim Kohal <sup>3</sup>, Thorsten Steinberg <sup>4</sup> and Brigitte Altmann <sup>3,5,\*</sup>

- <sup>1</sup> Karlsruhe Nano Micro Facility (KNMF), Karlsruhe Institute of Technology (KIT), 76344 Eggenstein-Leopoldshafen, Germany; alexander.welle@kit.edu
  - <sup>2</sup> Institute of Functional Interfaces, Karlsruhe Institute of Technology (KIT), 76344 Eggenstein-Leopoldshafen, Germany; matthias.schwotzer@kit.edu
  - <sup>3</sup> Department of Prosthetic Dentistry, Medical Center-University of Freiburg, Faculty of Medicine, University of Freiburg, 79106 Freiburg im Breisgau, Germany; kerstin.rabel@uniklinik-freiburg.de (K.R.); ralf.kohal@uniklinik-freiburg.de (R.J.K.)
  - <sup>4</sup> Department of Oral Biotechnology, Center for Dental Medicine, Medical Center -University of Freiburg, Faculty of Medicine, University of Freiburg, 79106 Freiburg im Breisgau, Germany; thorsten.steinberg@uniklinik-freiburg.de
  - <sup>5</sup> G.E.R.N Research Center for Tissue Replacement, Regeneration & Neogenesis, Department of Prosthetic Dentistry, Medical Center -University of Freiburg, Faculty of Medicine, University of Freiburg, 79085 Freiburg im Breisgau, Germany
- \* Correspondence: brigitte.altmann@uniklinik-freiburg.de  
† These authors contributed equally to this work.

**Citation:** Welle, A.; Rabel, K.; Schwotzer, M.; Kohal, R.J.; Steinberg, T.; Altmann, B. Identification of Zirconia Particle Uptake in Human Osteoblasts by ToF-SIMS Analysis and Particle-Size Effects on Cell Metabolism. *Nanomaterials* **2022**, *12*, 4272. <https://doi.org/10.3390/nano12234272>

Academic Editor: Wei Chen

Received: 25 October 2022

Accepted: 23 November 2022

Published: 1 December 2022

**Publisher's Note:** MDPI stays neutral with regard to jurisdictional claims in published maps and institutional affiliations.

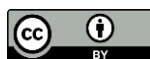

**Copyright:** © 2022 by the authors. Submitted for possible open access publication under the terms and conditions of the Creative Commons Attribution (CC BY) license (<https://creativecommons.org/licenses/by/4.0/>).

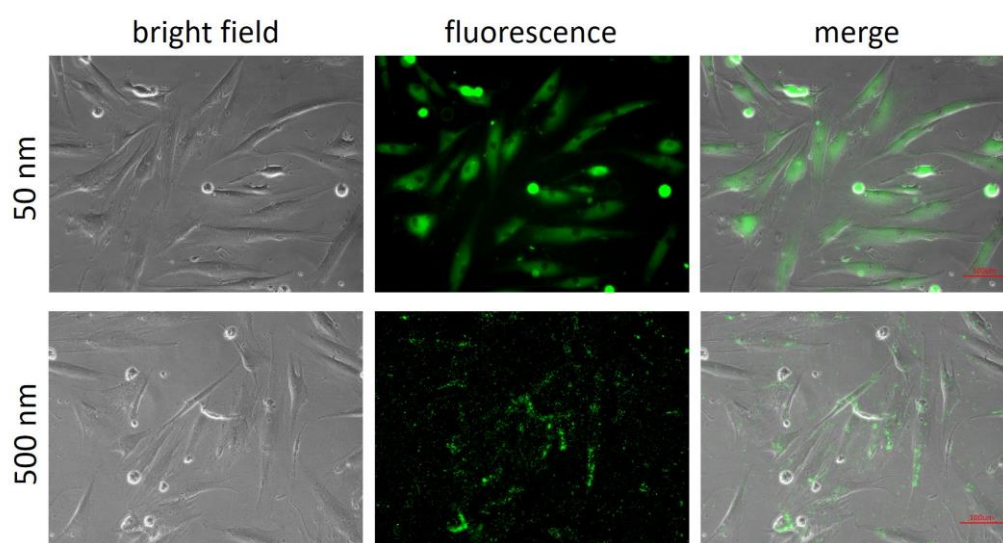

**Figure S1.** Microscopic analysis of fluorescent nanoparticle uptake by osteoblasts. Bright field and fluorescence images of primary human osteoblasts incubated with 10  $\mu\text{g/ml}$  fluorescent nanoparticles (Fluoresbrite, Polyscience Europe GmbH, Eppenheim, Germany) with 50 nm and 500 nm size for 4 h.
